# Supplementary material for: Evaluating the Effect of a COVID-19 Predictive Model to Facilitate Discharge: A Randomized Controlled Trial
Source: PubMed Central journal article supplement — Appl Clin Inform. 2022 Jul 27;13(3):632–40. doi: 10.1055/s-0042-1750416 (PMC9329139; doi:10.1055/s-0042-1750416), 2022-07-27
Supplement: 10-1055-s-0042-1750416-s210308ra.pdf [file 10-1055-s-0042-1750416-s210308ra.pdf]

**Supplementary Appendix A: Study protocol**

| COVID-19 Low risk AI RCT |                                                               |                                                                                                                                                                                                                                                                        |
|--------------------------|---------------------------------------------------------------|------------------------------------------------------------------------------------------------------------------------------------------------------------------------------------------------------------------------------------------------------------------------|
| CLINICALTRIALS. GOV      | Clinicaltrials.gov status                                     | Live                                                                                                                                                                                                                                                                   |
|                          | Approval number, if assigned                                  | NCT04570488                                                                                                                                                                                                                                                            |
|                          | Lay title                                                     | Predicting favorable outcomes in hospitalized COVID-19 patients                                                                                                                                                                                                        |
| INTRODUCTION             | Background                                                    |                                                                                                                                                                                                                                                                        |
|                          | Problem analysis                                              | Can we use predictive analytics to predict which COVID-19+ patients are at low risk for an adverse event (ICU transfer, intubation, mortality, hospice discharge, re-presentation to the ED, oxygen requirements exceeding nasal cannula at 6 L/min) in the next 96 h? |
|                          | Baseline data                                                 | Median 10 new green discharges per day; median LOS from green to discharge 3.3                                                                                                                                                                                         |
|                          | Observations                                                  |                                                                                                                                                                                                                                                                        |
|                          | Objective(s)                                                  | To assess if display of low risk of adverse event can safely reduce length of stay and plan for discharge.                                                                                                                                                             |
|                          | Project location                                              | NYU Langone Health                                                                                                                                                                                                                                                     |
|                          | Start date                                                    | 5/15/20                                                                                                                                                                                                                                                                |
|                          | Planned end study date                                        | 200 d, ending in Dec                                                                                                                                                                                                                                                   |
|                          | Key stakeholders                                              | Hospital leadership                                                                                                                                                                                                                                                    |
|                          | Project lead                                                  | Dr. Jonathan Austrian                                                                                                                                                                                                                                                  |
|                          | Team members                                                  | Yin Aphinyanaphongs, Narges Razavian, Vincent Major, Vuthy Nguy, Peter Stella, Michael Quinn                                                                                                                                                                           |
| INTERVENTIONS            | Intervention A versus Intervention B description              | Display of risk score/ colored flag in Epic patient list column versus no display (“hidden”); will be viewable to all frontline workers                                                                                                                                |
|                          |                                                               | b) Green: 90% chance of no adverse event @ 96 h                                                                                                                                                                                                                        |
|                          |                                                               | c) Orange: 67% chance of no adverse event @ 96 h                                                                                                                                                                                                                       |
|                          |                                                               | d) Red: 8% chance of no adverse event @ 96 h                                                                                                                                                                                                                           |
|                          |                                                               | e) Missing Data: Incomplete vitals (including spO2) in last 12 h OR no CBC w diff/CRP/LDH/BMP                                                                                                                                                                          |
|                          |                                                               | f) Hidden: calculation not displayed at random (QI project)                                                                                                                                                                                                            |
| OUTCOMES                 | Primary outcome                                               | Reduction in median days from first low-risk (green) score to discharge (GTD)                                                                                                                                                                                          |
|                          | Rationale                                                     | Once patient is low risk for an adverse event, care team can plan for discharge                                                                                                                                                                                        |
|                          | Is this outcome currently routinely captured in clinical care | Yes, using Epic (prior to QI project, green score did not exist)                                                                                                                                                                                                       |
|                          | Baseline performance                                          | Median 10 new green discharges per day; median LOS from green to discharge (GTD) 3.3                                                                                                                                                                                   |
|                          | Minimum clinically important effect size                      | Median -0.5 d                                                                                                                                                                                                                                                          |
|                          | Secondary outcome(s)                                          | 1. Reduction in LOS for green patients that have not been in the ICU                                                                                                                                                                                                   |
|                          |                                                               |                                                                                                                                                                                                                                                                        |

(Continued)

(Continued)

| COVID-19 Low risk AI RCT |                                                                                                                                                        |                                                                                                                                                                                                                              |
|--------------------------|--------------------------------------------------------------------------------------------------------------------------------------------------------|------------------------------------------------------------------------------------------------------------------------------------------------------------------------------------------------------------------------------|
|                          |                                                                                                                                                        | 2. Reduction in GTD versus LOS for all green patients discharged alive vs all patients discharged alive                                                                                                                      |
|                          |                                                                                                                                                        | 3. No change in 30 d re-ED presentation or hospital admission rate for cohort                                                                                                                                                |
|                          | Balancing outcome(s)                                                                                                                                   | Unintended consequences (re-presentation to ED, readmission, mortality, post-discharge mortality)                                                                                                                            |
|                          | Sub analyses                                                                                                                                           | Differences by site in the proportion of patients who turn green (all scored patients: 37% Tisch/Kimmel, 31% Long Island, 21% Brooklyn, 11% Orthopaedics) and their GTD vs. LOS.                                             |
|                          | Demographic characteristics                                                                                                                            | Age, race, ethnicity, sex, admitting location                                                                                                                                                                                |
|                          | Sensitivity analyses                                                                                                                                   | Deaths as censor events (competing risk?)                                                                                                                                                                                    |
|                          | Unintentional consequences                                                                                                                             | Longer LOS for patients who are never green worsening readmissions, re-presentations                                                                                                                                         |
|                          | Conditions for continuing/terminating the project                                                                                                      | Unintended consequences (re-presentation to ED, readmission, mortality, post-discharge mortality)                                                                                                                            |
|                          | Specify factors to consider if no significant difference found for the primary outcome (e.g., any improvement in primary outcome, secondary outcomes). |                                                                                                                                                                                                                              |
| PARTICIPANTS             | Study population definition                                                                                                                            | Adult hospitalized COVID19+ patients predicted to have no adverse event at 96 events with a threshold at 90% PPV, with at least one green score during their admission who are discharged alive and have not been in the ICU |
|                          | Exclusion criteria                                                                                                                                     | Age <18 y.                                                                                                                                                                                                                   |
|                          | Expect N/wk                                                                                                                                            | 10                                                                                                                                                                                                                           |
|                          | N required to reach desired effect size with 80% power                                                                                                 | 500 per arm, 1,000 total                                                                                                                                                                                                     |
|                          | Anticipated screening                                                                                                                                  | 2,000–4,000 (screening to end once 1,000 patients who have been discharged with at least one green are reached)                                                                                                              |
| RANDOMIZATION            | Unit of randomization (patient, provider, hospital-level)                                                                                              | Patient level randomization                                                                                                                                                                                                  |
|                          | Allocation ratio                                                                                                                                       | 1:1, Odd OR even last digit of Epic Enterprise ID                                                                                                                                                                            |
|                          | <i>Sequence generation</i>                                                                                                                             |                                                                                                                                                                                                                              |
|                          | Method for generating the random allocation sequence                                                                                                   | Odd OR even last digit of Epic Enterprise ID                                                                                                                                                                                 |
|                          | Type of randomization, details of any restriction (e.g., blocking and blocking size)                                                                   | Pseudo-randomization                                                                                                                                                                                                         |
|                          | <i>Allocation concealment mechanism</i>                                                                                                                |                                                                                                                                                                                                                              |
|                          | Mechanism for implementing random allocation sequence                                                                                                  | Epic                                                                                                                                                                                                                         |
|                          | <i>Implementation</i>                                                                                                                                  |                                                                                                                                                                                                                              |
|                          | Who will generate random allocation sequence                                                                                                           | Epic                                                                                                                                                                                                                         |

(Continued)

| COVID-19 Low risk AI RCT |                                               |      |
|--------------------------|-----------------------------------------------|------|
|                          | Who will enroll participants                  | Epic |
|                          | Who will assign participants to interventions | Epic |
|                          | <i>Blinding</i>                               |      |
|                          | Patient? Y/N                                  | Y    |
|                          | Provider? Y/N                                 | N    |
|                          | Investigator? Y/N                             | N    |
|                          | Data Analyst? Y/N                             | Y    |
| DATA ANALYSIS            | Analytical approach                           |      |
|                          | Rationale                                     |      |

## Supplementary Appendix B: Clinical Decision Support

The appearance of the risk score within clinical decision support (CDS) is restricted by the functionality of the Epic EHR. When added to a patient list ([►Appendix Fig. B1](#)), the risk score appears as a color-coded oval (green, orange, or red) containing the numeric risk on a scale of 0 to 100 for patients allocated to the intervention arm. Those in the control arm are uncolored displaying the word “Hidden.” Patients with missing data cannot have a score created and are uncolored displaying “Missing data.”

When a user hovers over the score, an explanatory bubble expands ([►Appendix Fig. B2](#)). The bubble contains the current score, a trendline of recent scores, and a table containing the nine largest contributing factors (in magnitude), their contribution and current value.

The second channel users can view model risk scores is from within a COVID-19 specific summary report where the risk scores are only one component ([►Appendix Fig. B3](#)).

## Supplementary Appendix C: Supplementary Results

Length of stay is a continuous, nonzero quantity that is often non-uniformly distributed. The primary and secondary outcomes of this study, gLOS and LOS are non-uniform ([►Appendix Fig. C1](#)). The pre-specified decision to use Mann-Whitney tests to evaluate any intervention effect compares the median rather than the shape of the distribution. A planned Gamma regression would be more sensitive to distributional differences away from the median. However, [►Appendix Fig. C1](#) suggests little difference in the distributions of gLOS and LOS.

### Planned Gamma Regression

The planned Gamma regression evaluation would help control for residual imbalance between treatment groups or

temporal effects for example. Possible confounding variables were investigated by comparing the medians and interquartile ranges (IQR) for demographic, geographic, and temporal variables ([►Appendix Table C1](#)).

Assembling sex, age (2nd order polynomial), location, month of first green score, and primary symptoms into a gamma regression found the intervention was not a significant predictor of gLOS ([►Appendix Table C2](#)). Age (non-linear), later months, and one hospital location were significant.

### Unplanned Secondary Analyses

#### Stratification by Location

Stratifying the primary cohort into the four hospital locations reveals large location-specific trends in the intervention effect on gLOS ([►Appendix Table C3](#)) where the median effect at hospital Tisch/Kimmel exceeds 0.5 days but is underpowered (control,  $n = 140$ : 3.82 [1.89–6.70] vs. intervention,  $n = 130$ : 3.17 [1.38–5.82],  $p = 0.07$ ). Operational differences between hospital locations such as resourcing, role composition of care teams, cohorting of patients with COVID-19 as well as gaps in outreach of this AI system could cause this observed trend. Note that location Orthopaedics consisted of a very small percentage of the total study patients (1.8%) but the median gLOS was very long as this location is an Orthopaedics surgical hospital without an emergency department.

Prolongation of the study period to enroll 1,000 patients at Tisch/Kimmel hospital (extending to March 31, 2021) reduces the median gLOS, suggesting pronounced temporal effects, but no detectable difference is observed (control,  $n = 478$ : 2.61 [1.33–4.77], intervention,  $n = 522$ : 2.42 [1.23–4.83],  $p = 0.3$ ).

#### Temporal Shift

Related works have found temporal changes in LOS and survival<sup>24,25</sup> through the pandemic that may extend to gLOS. Splitting the cohort into four groups by the month of their first green score reveals a general decrease in gLOS and

a U-shape in LOS (→Appendix Table C1). The gamma regression highlights the latter two groups as significant predictors. Grouping into these two halves, early (May–August,  $n = 482$ ) and late (September–December,  $n = 528$ ) reveals a complex relationship between time and study group. The control group experiences a negligible decrease in gLOS over time. But, the intervention group starts higher and decreases dramatically (→Appendix Table C4; May–Aug: 3.66 [2.00–6.40] vs. Sep–Dec: 2.82 [1.52–5.14],  $p = 0.006$ ). In both early and late periods, the intervention had no detectable effect as the interquartile ranges were similar.

Together these results suggest that any effect of the intervention reducing gLOS is smaller than temporal changes yielded by factors such as reduced surge burden, expanded testing, improved treatment, and shifts in hospitalization rates by hospital location. A non-randomized study, such as a pre-post analysis, would have been susceptible to wrongly attributing these changes to the intervention.

### Primary Respiratory Symptoms

During the study, the weekly census of patients with COVID-19 dropped and rose again (→Fig. 2). As the COVID-19 burden waned, more patients with secondary COVID-19 infection were observed as elective surgeries resumed, for example. ICD-10 diagnosis codes were used to identify admissions with a primary diagnosis consistent with the typical symptoms of COVID-19 (e.g., acute respiratory failure = J96.01, pneumonia = J18.9 or U07.1, shortness of breath = R06.02, see →Appendix Table C5 for complete list).

Primary respiratory symptoms were found for half of patients ( $n = 525$ ) who had longer gLOS and LOS (→Appendix Table C1). The intervention had no detectable difference among patients who did or did not have a primary symptom consistent with COVID-19 (→Appendix Table C6).

| COVID AI RCT TEST 12 Patients |           |                                    |                   |                                           |                         |
|-------------------------------|-----------|------------------------------------|-------------------|-------------------------------------------|-------------------------|
| Pa<br>MRN Na ▲                | Infection | Principal Problem                  | Length<br>of Stay | Covid-19 Low<br>Risk of Adverse<br>Events | Smoking Status          |
|                               | COVID-19  | —                                  | 2d 1h             | 12                                        | Never Smoker            |
|                               | COVID-19  | COVID-19                           | 4d 22h            | Hidden                                    | Never Smoker            |
|                               | COVID-19  | Pneumonia due to<br>COVID-19 virus | 4d 7h             | 100                                       | Former Smoker           |
|                               | COVID-19  | —                                  | 9d 23h            | 39                                        | Never Assessed          |
|                               | COVID-19  | Closed fracture<br>of left patella | 8d 18h            | 36                                        | Former Smoker           |
|                               | COVID-19  | —                                  | 7d 4h             | 11                                        | Never Smoker            |
|                               | COVID-19  | Pneumonia due to<br>COVID-19 virus | 1d 9h             | Hidden                                    | Never Assessed          |
|                               | COVID-19  | —                                  | 5d 2h             | 13                                        | Former Smoker           |
|                               | COVID-19  | Pneumonia due to<br>COVID-19 virus | 6d 18h            | 100                                       | Never Smoker            |
|                               | COVID-19  | 2019 novel<br>coronavirus detected | 1d 22h            | Hidden                                    | Never Smoker            |
|                               | COVID-19  | Pneumonia due to<br>COVID-19 virus | 5d 19h            | Hidden                                    | Current Some Day Smoker |
|                               | COVID-19  | Pneumonia due to<br>COVID-19 virus | 5d 16h            | Missing data                              | Never Smoker            |

Appendix Fig. B1 Display of the risk score via the patient list column.

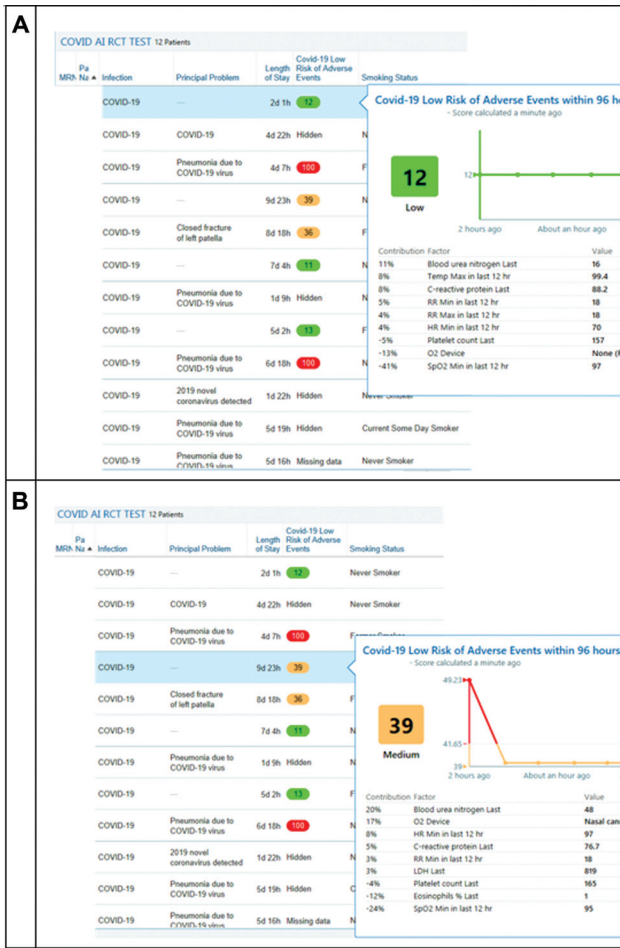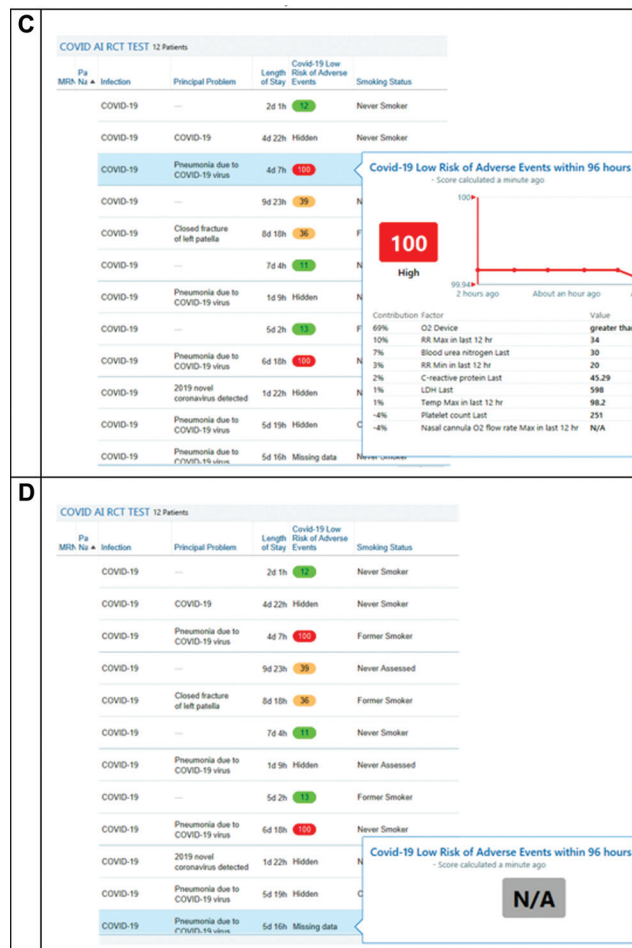

Appendix Fig. B2 Explanatory bubble for patients with (A) green, (B) orange, (C) red, (D) missing scores for patients allocated to the intervention group, and (E) patients allocated to the control arm.

Appendix Fig. B2 (contd.)

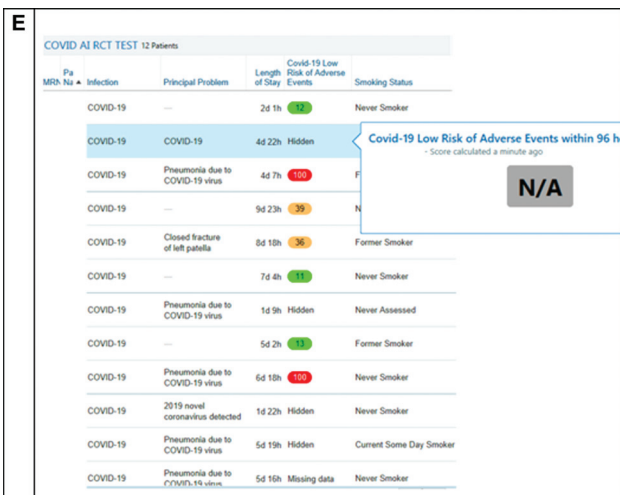

Appendix Fig. B2 (contd.)

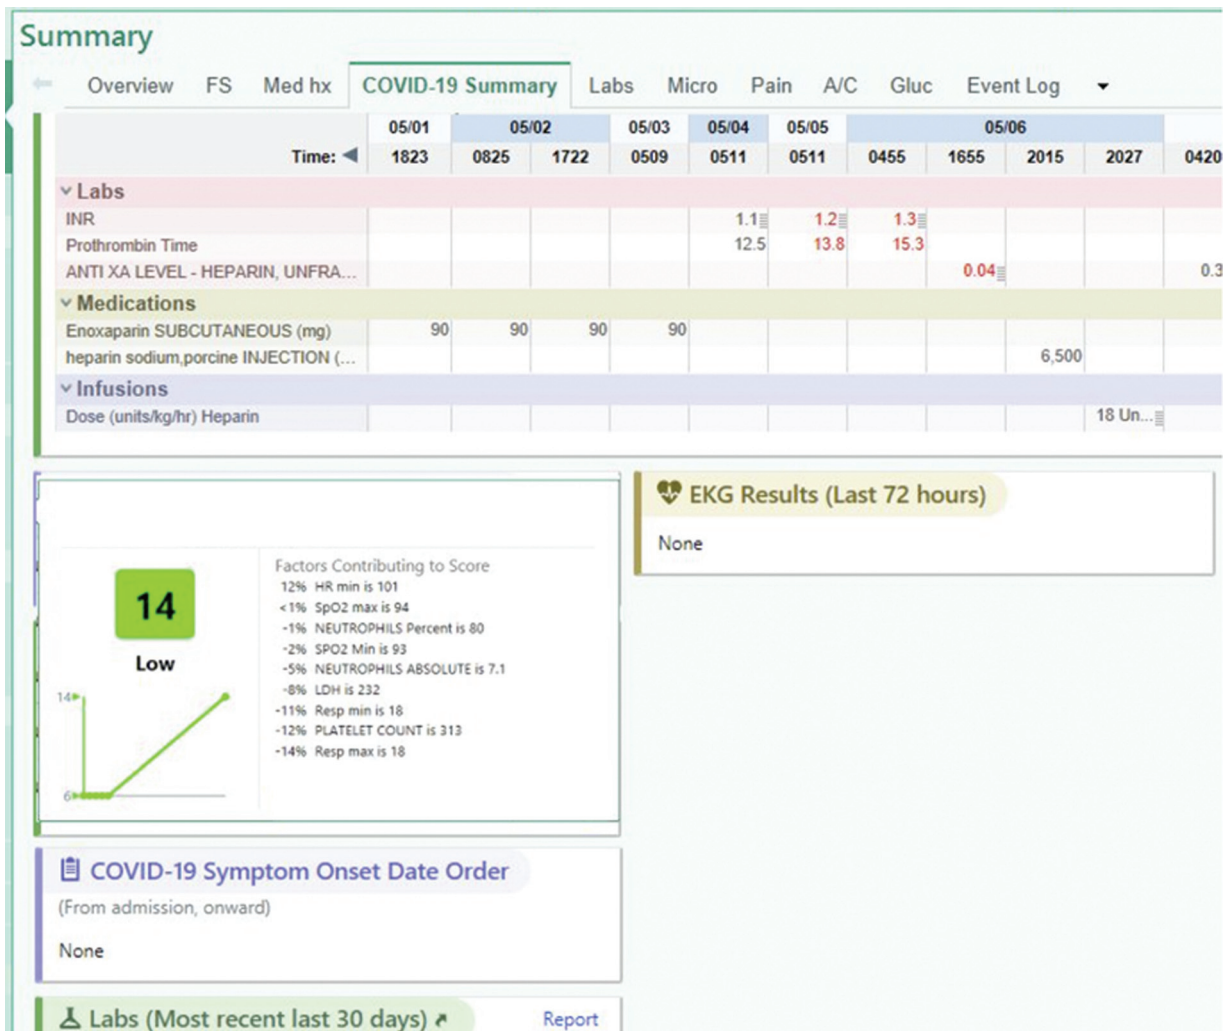

Appendix Fig. B3 Display of the risk score as one component of a larger COVID-19 summary report.

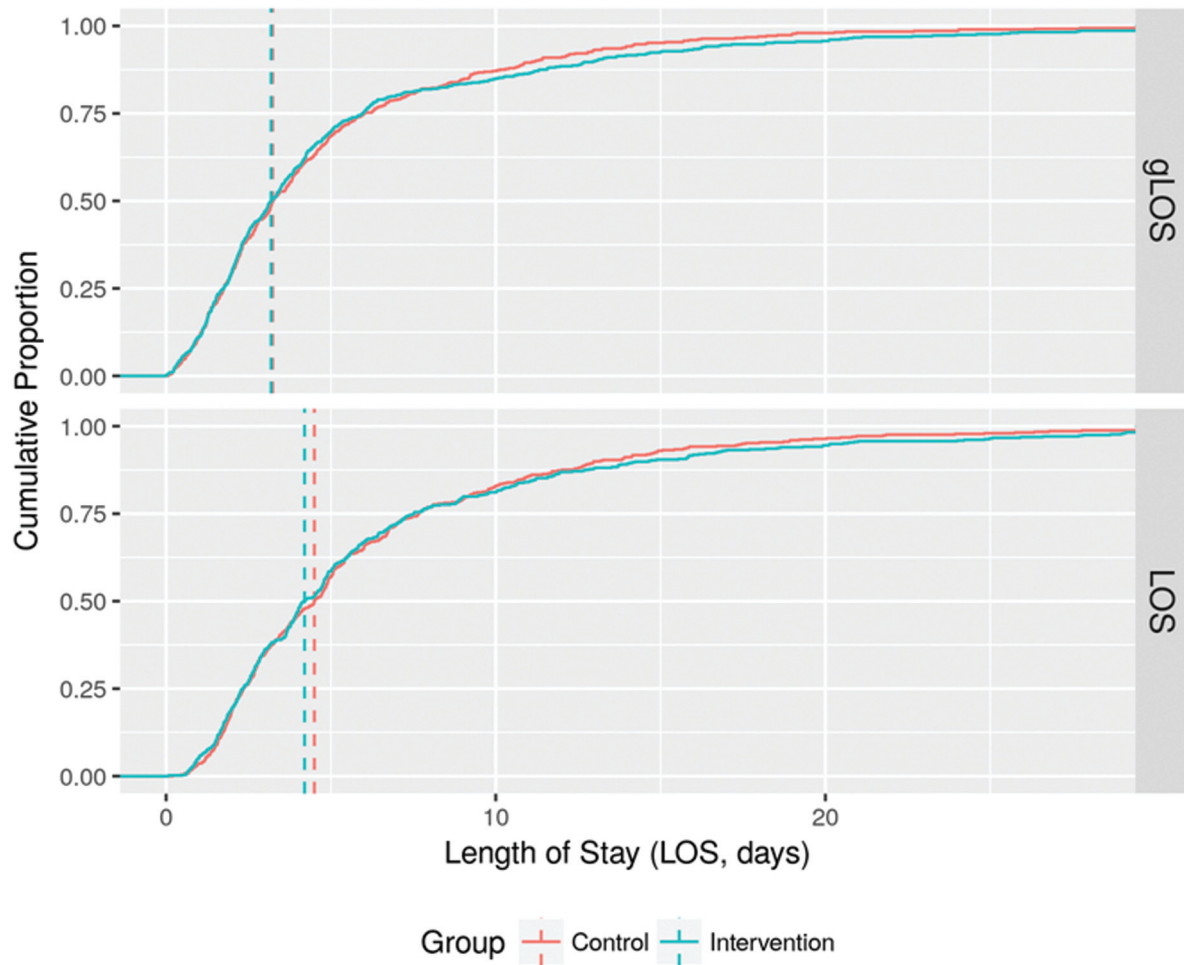

Appendix Fig. C1 Cumulative distribution of gLOS and LOS by allocated study group with median highlighted.

**Appendix Table C1** gLOS and LOS stratified by demographics, location, month of first green score, and primary symptoms

| Strata                     |                | gLOS                       | LOS                        |
|----------------------------|----------------|----------------------------|----------------------------|
| Sex                        |                |                            |                            |
| Female                     | <i>n</i> = 526 | 3.02 [1.78–5.52]           | 3.78 [2.15–6.78]           |
| Male                       | <i>n</i> = 484 | <u>3.53 [1.66–6.35]</u>    | <u>4.90 [2.75–8.78]</u>    |
| Age                        |                |                            |                            |
| Age ≤52                    | <i>n</i> = 340 | 2.31 [1.56–3.76]           | 2.85 [1.99–5.01]           |
| 52 <Age ≤69                | <i>n</i> = 337 | 3.60 [1.62–5.89]           | 4.71 [2.52–7.81]           |
| Age >69                    | <i>n</i> = 333 | <u>4.52 [2.24–9.03]</u>    | <u>5.48 [3.10–11.01]</u>   |
| Ethnicity                  |                |                            |                            |
| Hispanic                   | <i>n</i> = 258 | 2.70 [1.55–4.54]           | 3.22 [2.02–5.56]           |
| Not Hispanic               | <i>n</i> = 752 | <u>3.47 [1.83–6.44]</u>    | <u>4.79 [2.55–8.34]</u>    |
| Race                       |                |                            |                            |
| African American (Black)   | <i>n</i> = 122 | 3.04 [1.43–5.43]           | 4.04 [2.05–7.24]           |
| Asian                      | <i>n</i> = 61  | 2.47 [1.24–5.80]           | 4.78 [2.49–6.87]           |
| Native American            | <i>n</i> = 12  | 1.92 [1.60–3.79]           | 3.03 [1.82–4.99]           |
| Other                      | <i>n</i> = 295 | 2.98 [1.68–5.04]           | 3.75 [2.21–7.10]           |
| Pacific Islander           | <i>n</i> = 9   | 2.15 [1.56–9.90]           | 2.61 [1.99–10.24]          |
| White                      | <i>n</i> = 511 | <u>3.64 [1.96–6.41]</u>    | <u>4.79 [2.60–7.81]</u>    |
| Location                   |                |                            |                            |
| Tisch/Kimmel               | <i>n</i> = 270 | 3.38 [1.64–6.21]           | 4.7 [2.52–7.76]            |
| Orthopaedics               | <i>n</i> = 18  | <u>15.69 [10.93–19.94]</u> | <u>15.83 [10.95–20.20]</u> |
| Brooklyn                   | <i>n</i> = 416 | 2.70 [1.70–5.00]           | 3.33 [2.10–6.61]           |
| Long Island                | <i>n</i> = 306 | 3.83 [2.00–6.03]           | 5.02 [2.82–7.72]           |
| Month of first green score |                |                            |                            |
| May-June                   | <i>n</i> = 285 | <u>3.81 [2.03–8.42]</u>    | 4.70 [2.33–9.21]           |
| July-August                | <i>n</i> = 197 | 3.17 [1.92–4.97]           | 3.86 [2.29–6.73]           |
| Sep-October                | <i>n</i> = 193 | 3.20 [1.75–5.37]           | 4.40 [2.27–6.29]           |
| Nov-December               | <i>n</i> = 335 | 3.05 [1.38–5.77]           | 4.76 [2.54–8.06]           |
| Primary symptom            |                |                            |                            |
| Respiratory/COVID-19       | <i>n</i> = 525 | <u>3.64 [1.88–6.42]</u>    | <u>5.01 [2.84–8.10]</u>    |
| Other                      | <i>n</i> = 485 | 2.90 [1.71–5.11]           | 3.44 [2.08–6.76]           |

Note: Age was binned into tertiles, month of first green score into bins of two calendar months. Underlined values denote the largest gLOS and LOS for each category.



**Appendix Table C2** Gamma regression coefficients

| Covariate                  | Coefficient | Std. error | p-Value |   |
|----------------------------|-------------|------------|---------|---|
| Intercept                  | 0.55        | 0.068      | <0.001  |   |
| Study group                |             |            |         |   |
| Control                    | Reference   |            |         |   |
| Intervention               | -0.0098     | 0.012      | 0.4     |   |
| Sex                        |             |            |         |   |
| Female                     | Reference   |            |         |   |
| Male                       | -0.0073     | 0.012      | 0.5     |   |
| Age                        |             |            |         |   |
| Linear                     | -0.0087     | 0.0021     | <0.001  | * |
| 2nd order polynomial       | 0.000047    | 0.000016   | 0.004   | * |
| Location                   |             |            |         |   |
| Tisch/Kimmel               | Reference   |            |         |   |
| Orthopaedics               | -0.091      | 0.02       | <0.001  | * |
| Brooklyn                   | -0.0077     | 0.016      | 0.6     |   |
| Long Island                | -0.012      | 0.016      | 0.5     |   |
| Month of first green score |             |            |         |   |
| May-June                   | Reference   |            |         |   |
| July-August                | 0.036       | 0.019      | 0.05    | . |
| Sep-October                | 0.048       | 0.019      | 0.01    | * |
| Nov-December               | 0.035       | 0.015      | 0.02    | * |
| Primary symptoms           |             |            |         |   |
| Non-COVID-19               | Reference   |            |         |   |
| COVID-19                   | -0.0022     | 0.012      | 0.9     |   |

Note: Statistical significance is indicated (\*) for  $p < 0.05$  where (.) for  $p = 0.05$ .

**Appendix Table C3** Intervention effect on gLOS stratified by hospital location of admission

| Hospital     | Control            | Intervention        | Mann-Whitney p-value |
|--------------|--------------------|---------------------|----------------------|
| Tisch/Kimmel | 3.82 [1.89–6.70]   | 3.17 [1.38–5.82]    | 0.07                 |
| Orthopaedics | 14.61 [7.28–17.95] | 15.84 [12.31–24.58] | 0.4                  |
| Brooklyn     | 2.68 [1.71–4.76]   | 2.82 [1.63–5.19]    | 0.5                  |
| Long Island  | 3.99 [1.63–6.22]   | 3.59 [2.11–6.03]    | 0.8                  |

**Appendix Table C4** Intervention effect on gLOS stratified by month of first green score into early or late period

| Month                | Control          | Intervention     | Mann-Whitney p-value |
|----------------------|------------------|------------------|----------------------|
| May–Aug              | 3.29 [1.96–6.33] | 3.66 [2.00–6.40] | 0.7                  |
| Sep–Dec              | 3.21 [1.62–5.84] | 2.82 [1.52–5.14] | 0.4                  |
| Mann-Whitney p-value | 0.2              | 0.006            |                      |

**Appendix Table C5** ICD-10 diagnosis codes used to label diagnoses as consistent with symptoms of COVID-19

| ICD-10 Code   | ICD-10 Description                                                                     | %    | N   |
|---------------|----------------------------------------------------------------------------------------|------|-----|
| U07.1         | COVID-19                                                                               | 43.8 | 442 |
| A41.89        | Other specified sepsis                                                                 | 8.6  | 87  |
| R06.02        | Shortness of breath                                                                    | 4.3  | 43  |
| J96.01        | Acute respiratory failure with hypoxia                                                 | 2.8  | 28  |
| A41.9         | Sepsis, unspecified organism                                                           | 2.0  | 20  |
| J18.9         | Pneumonia, unspecified organism                                                        | 1.7  | 17  |
| J44.1         | Chronic obstructive pulmonary disease with (acute) exacerbation                        | 0.3  | 3   |
| J12.89        | Other viral pneumonia                                                                  | 0.1  | 1   |
| J96.91        | Respiratory failure, unspecified with hypoxia                                          | 0.1  | 1   |
| R05           | Cough                                                                                  | 0.1  | 1   |
| A41.9         | Sepsis, unspecified organism                                                           | 0    | 0   |
| B97.29        | Other coronavirus as the cause of diseases classified elsewhere                        | 0    | 0   |
| J06.9         | Acute upper respiratory infection, unspecified                                         | 0    | 0   |
| J12.81        | Pneumonia due to SARS-associated coronavirus                                           | 0    | 0   |
| J12.9         | Viral pneumonia, unspecified                                                           | 0    | 0   |
| J21.9         | Acute bronchiolitis, unspecified                                                       | 0    | 0   |
| J22           | Unspecified acute lower respiratory infection                                          | 0    | 0   |
| J80           | Acute respiratory distress syndrome                                                    | 0    | 0   |
| J98.8         | Other specified respiratory disorders                                                  | 0    | 0   |
| O99.512O99.52 | Diseases of the respiratory system complicating pregnancy, second trimester/childbirth | 0    | 0   |
| R09.2         | Respiratory arrest                                                                     | 0    | 0   |

**Appendix Table C6** Intervention effect on gLOS stratified by primary diagnosis code consistent with the symptoms of COVID-19

| Primary symptom              | Control          | Intervention     | Mann-Whitney <i>p</i> -value |
|------------------------------|------------------|------------------|------------------------------|
| Non-COVID-19                 | 2.75 [1.76–4.90] | 2.98 [1.54–5.36] | 0.7                          |
| COVID-19                     | 3.97 [1.75–7.13] | 3.42 [1.92–6.03] | 0.4                          |
| Mann-Whitney <i>p</i> -value | 0.01             | 0.2              |                              |
